# Supplementary material
Source: Springer Nature journal article supplement (https://www.springermedizin.de/resource/supplementary/12967_2011_977_MOESM6_ESM.PDF/9577268)
Supplement: MOESM6 [file 9577268]

**Additional File 6:** Env epitope mapping for post-*in vitro* stimulated cells from a vaccine trial responder subject. PBMC from a vaccinee in the RV158 trial (received 3x rMVA-CMDR) were subjected two rounds of *in vitro* stimulation, first with rMVA-CMDR for 14 days, then with autologous, irradiated BLCL pulsed with peptide pools matching the Env (CM235) insert in the vaccine. Each stimulation cycle was 14 days, with rIL-7 added during the first week and rIL-2 added during the second week. Effector cells were tested for responses to a matrix of peptides (14 x 13 peptide pools) matching the Env insert sequence. Epitopes were counted and identified from the de-convoluted peptide matrix (panels A and B) in an IFN- $\gamma$  Elispot assay. Two epitopes were identified within the Env-specific effector cells and are shown in panel C.

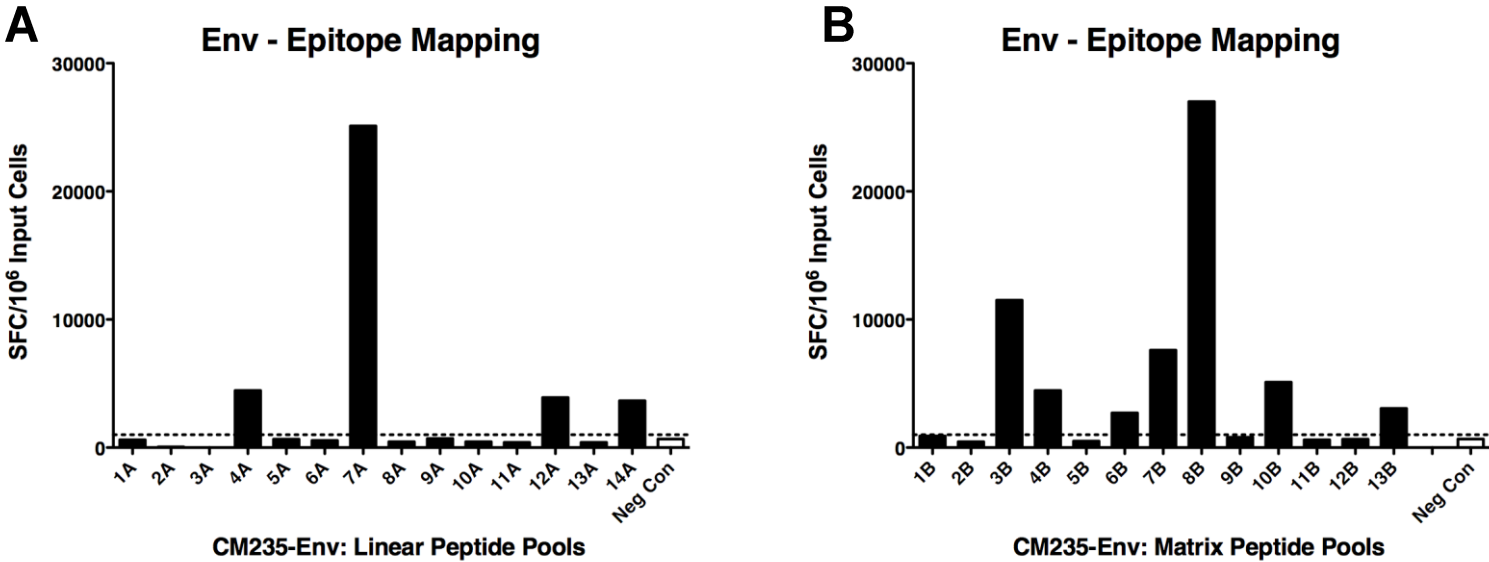

**C** Mapped and identified Env epitopes. Sequences of the mapped Env epitopes are shown together with the percent 10-mer identity each epitope shares with the denoted number of intra-subtype (CR01\_AE) and global group M sequences.

| Epitope | Sequence        | Intra-subtype Env Coverage | Global Env Coverage |
|---------|-----------------|----------------------------|---------------------|
|         |                 | 111 Sequences              | 2230 Sequences      |
| 1       | VHALFYKLDIVPIED | 20.70%                     | 6.9%                |
| 2       | EKLKEHFNNKTIIFQ | 0%                         | 0%                  |
| 3       | EISNYTNQIYEILTE | 45.10%                     | 2.8%                |
| 4       | EPDRSERIEEGGGEQ | 30.6%                      | 5.7%                |
